# Supplementary material for: Unifying Viral Genetics and Human Transportation Data to Predict the Global Transmission Dynamics of Human Influenza H3N2
Source: PubMed Central journal article supplement (PMC3930559; doi:10.1371/journal.ppat.1003932), 2014-02-20

predictors

A

B

C

- Average distance
- Minimum distance
- Origin absolute latitude
- Destination absolute latitude
- Passenger flow
- within origin passenger flow
- within destination passenger flow
- Origin population size
- Destination population size
- Origin population density
- Destination population density
- Origin urban population size
- Destination urban population size
- Origin urban population density
- Destination urban population density
- Origin agglomeration index
- Destination agglomeration index
- H3 Incidence overlap
- H3 Origin incidence versus destination growth
- Peak time difference
- Origin incidence 4 weeks prior to destination peak
- Origin incidence 8 weeks prior to destination peak
- Origin incidence 12 weeks prior to destination peak
- Origin incidence 16 weeks prior to destination peak
- Origin incidence 20 weeks prior to destination peak
- Origin incidence 24 weeks prior to destination peak
- Origin seasonal incidence entropy
- Destination seasonal incidence entropy
- Origin above–median incidence
- Destination above–median incidence
- Origin antigenic divergence
- Destination antigenic divergence
- Origin gross domestic product
- Destination gross domestic product
- Origin sample size
- Destination sample size

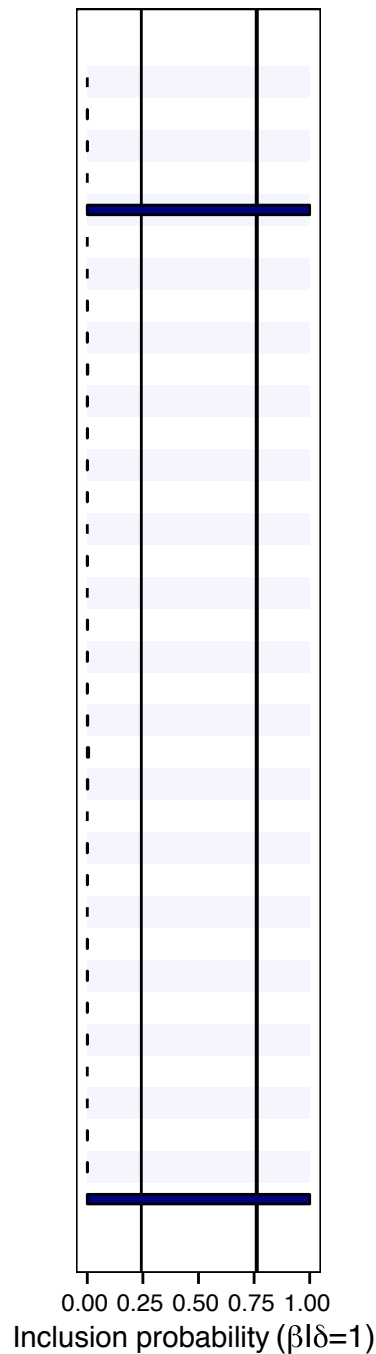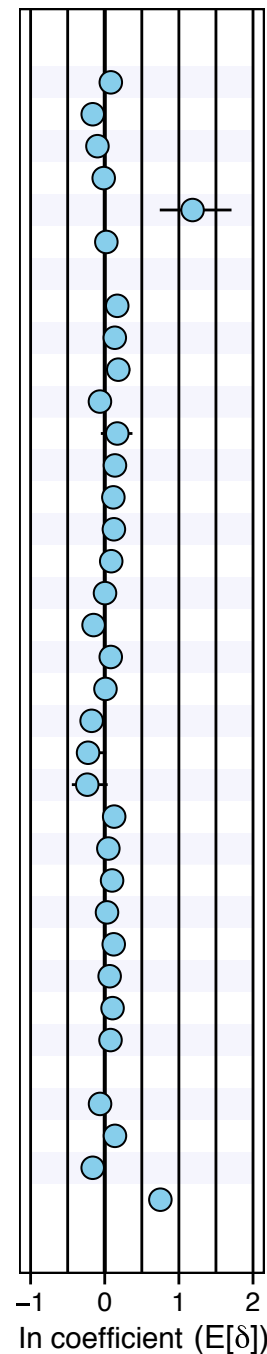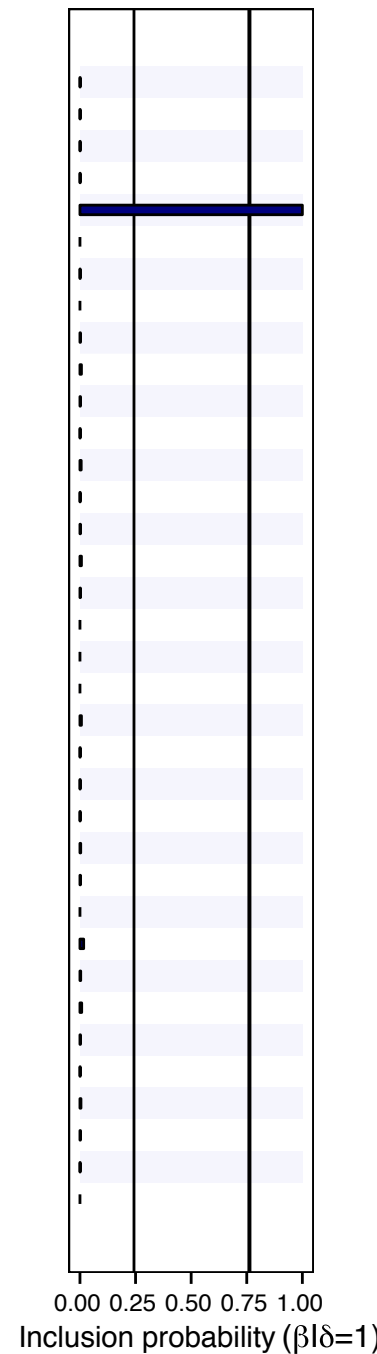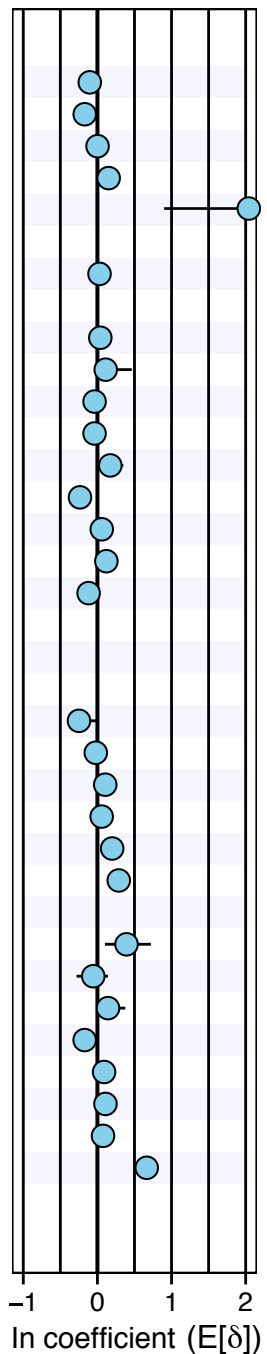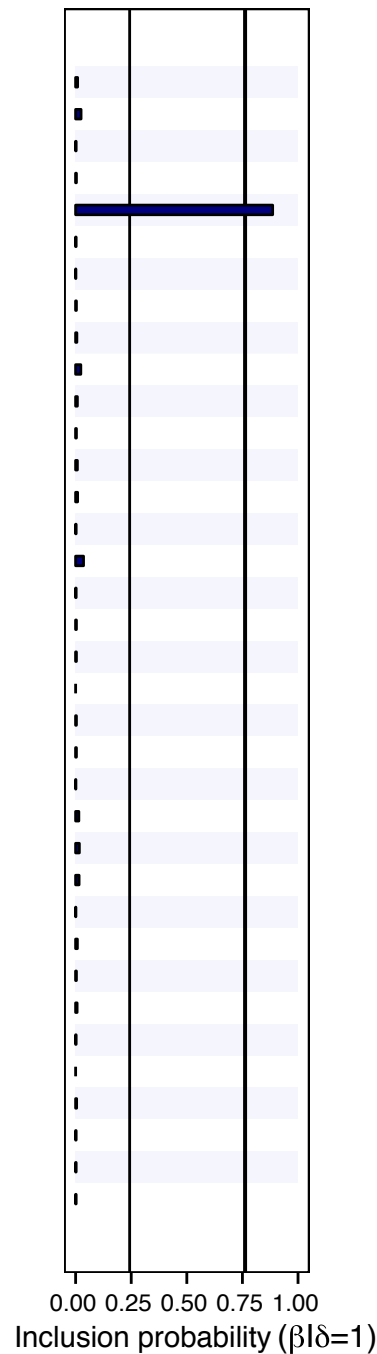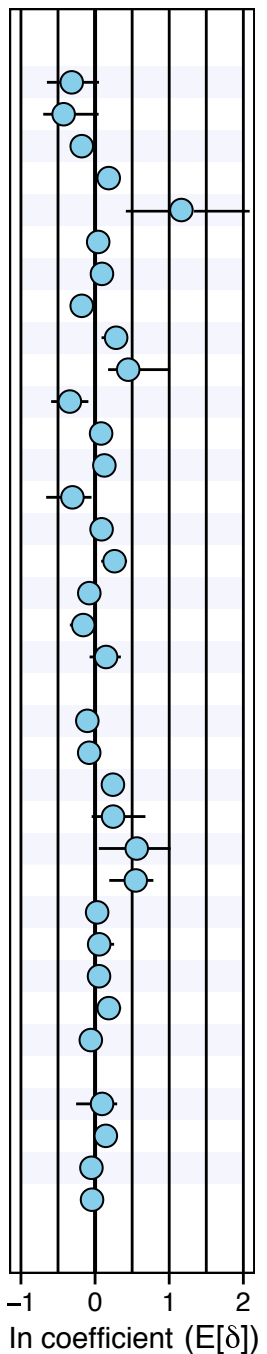

Supplement: ppat.1003932.s003.pdf [file ppat.1003932.s003.pdf]
