# Supplementary material for: Unifying Viral Genetics and Human Transportation Data to Predict the Global Transmission Dynamics of Human Influenza H3N2
Source: PubMed Central journal article supplement (PMC3930559; doi:10.1371/journal.ppat.1003932), 2014-02-20
Supplement: ppat.1003932.s006.pdf [file ppat.1003932.s006.pdf]

## Supplementary Figure S9

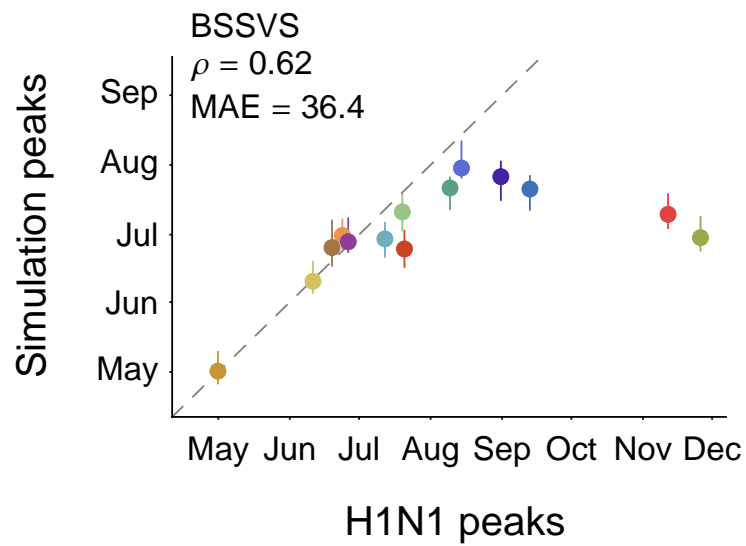

Figure S9: Correlation among observed H1N1 peaks and simulated peaks based on the BSSVS estimates. The Spearman rank correlation ( $\rho$ ) and mean absolute error (MAE; in days) for all locations except for Mexico is shown at the top left. The data points are colored according to the air communities represented in Fig. 1 in the main text.
